# Supplementary material for: The influence of the windlass mechanism on kinematic and kinetic foot joint coupling
Source: Springer Nature journal article supplement (doi:10.1186/s13047-022-00520-z), 2022-01-01
Supplement: MOESM1 [file 20139880]

**Table S1. Marker Names and Description of Placement**

| <b>Marker Name</b> | <b>Description of Placement</b>                                                                                                |
|--------------------|--------------------------------------------------------------------------------------------------------------------------------|
| HEAD               | Top of the head                                                                                                                |
| LKN                | Lateral epicondyle of femur                                                                                                    |
| MKN                | Medial epicondyle of femur                                                                                                     |
| SHK1-4*            | Shank cluster 1-4; rigid cluster on lateral shank                                                                              |
| LANK               | Lateral malleolus                                                                                                              |
| MANK               | Medial malleolus                                                                                                               |
| PCL*               | Proximal calcaneus                                                                                                             |
| DCL*               | Distal calcaneus; apex of calcaneal tuberosity                                                                                 |
| LCL*               | Lateral calcaneus                                                                                                              |
| MCL*               | Medial calcaneus                                                                                                               |
| CUB                | Cuboid; lateral cuboid                                                                                                         |
| NAV                | Navicular; navicular tuberosity                                                                                                |
| MB1                | Dorsal surface of the base of the 1 <sup>st</sup> metatarsal                                                                   |
| MB4                | Dorsal surface of the base of the 4 <sup>th</sup> metatarsal                                                                   |
| MHD                | Dorsal surface 1 <sup>st</sup> metatarsal head; dorsum of head of the 1 <sup>st</sup> metatarsal                               |
| MH1                | 1 <sup>st</sup> Metatarsal head; medial aspect of head of the 1 <sup>st</sup> metatarsal                                       |
| 23MH               | 2 <sup>nd</sup> and 3 <sup>rd</sup> Metatarsal heads; midpoint of heads of the 2 <sup>nd</sup> and 3 <sup>rd</sup> metatarsals |
| MH5                | 5 <sup>th</sup> Metatarsal head; lateral aspect of head of the 5 <sup>th</sup> metatarsal                                      |
| HAL                | Hallux; dorsum of the distal phalanx of the hallux                                                                             |

\*Tracking Marker

**Figure S1. Dorsal, lateral, medial, and posterior views of multisegment foot markers. Marker names are abbreviated. Full marker name and description of placement can be found in Table S1.**

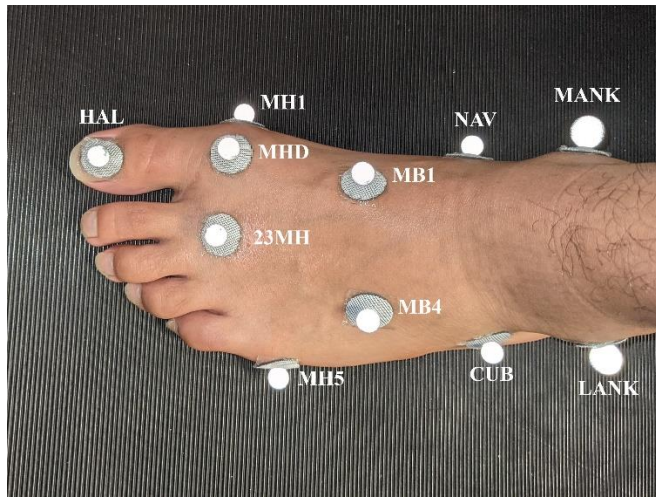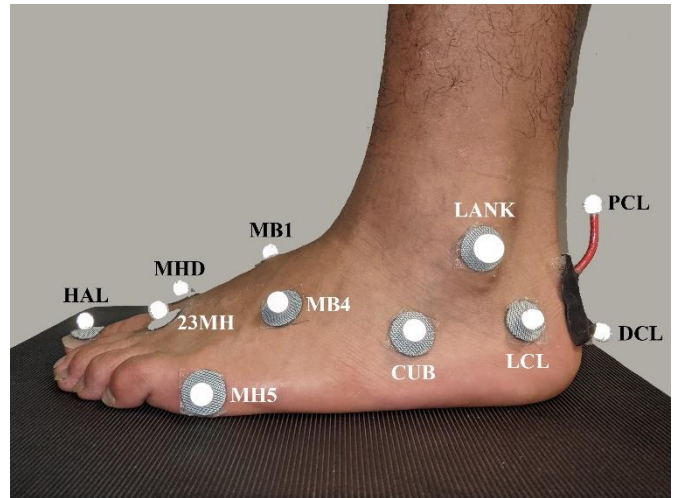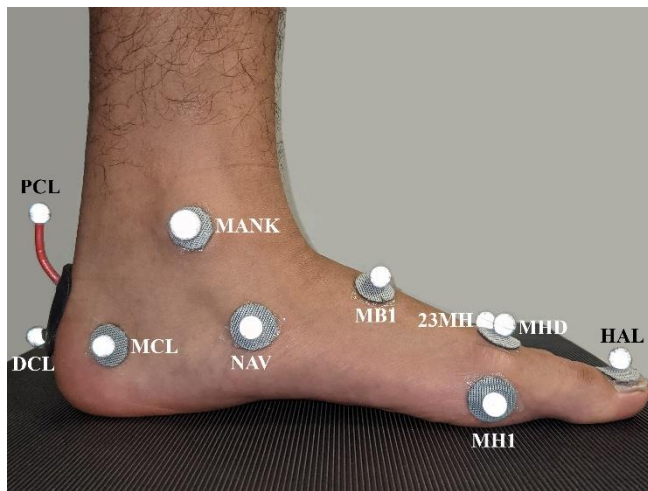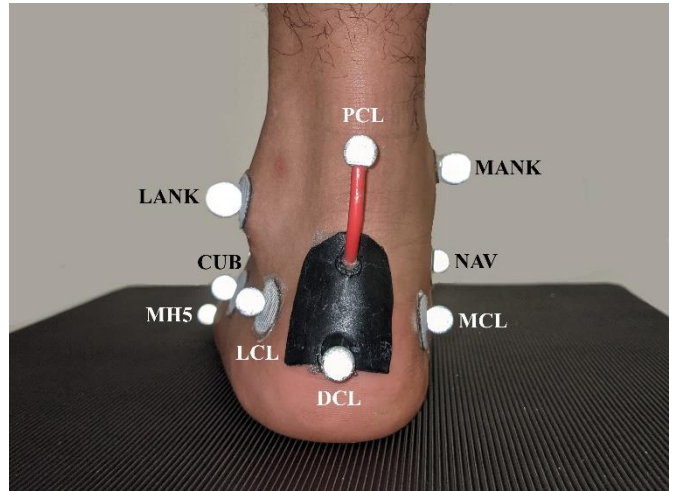

**Table S2. Virtual Landmarks for Multi-segment Foot Model**

|            |                                                                          |
|------------|--------------------------------------------------------------------------|
| MJC        | Midtarsal joint center – midpoint between CUB, NAV                       |
| FF_Dist    | Forefoot distal end – project 23MH down to average height of MH1 and MH5 |
| MTPC       | 1 <sup>st</sup> MTP joint center – project MHD ½ distance to floor       |
| HAL_Dist   | Hallux distal end – project HAL ½ distance to floor                      |
| MTPC_Track | MTPC tracked by forefoot segment                                         |
| MHD_Track  | MHD tracked by forefoot segment                                          |
| MHD_Proj   | MHD_Track projected laterally in plane of HAL, MTPC_Track, MHD_Track     |

**Table S3. Multi-segment foot model segment reference frame definitions**

| Segment  | Long Axis      | Plane                         | Tracking Markers          |
|----------|----------------|-------------------------------|---------------------------|
| Hindfoot | DCL to MJC     | DCL, MJC, PCL (Sagittal)      | DCL, MCL, LCL             |
| Forefoot | MJC to FF_Dist | MJC, FF_Dist, 23MH (Sagittal) | MB1, MB4, 23MH, MH1, MH5  |
| Hallux   | MPC to HX_Dist | MPC, HAL_Dist, MH1 (Sagittal) | HAL, MTPC_Track, MHD_Proj |
